# Supplementary material
Source: MDPI journal article supplement (https://www.mdpi.com/2072-4292/12/7/1185)
Supplement: s1 [file s1]

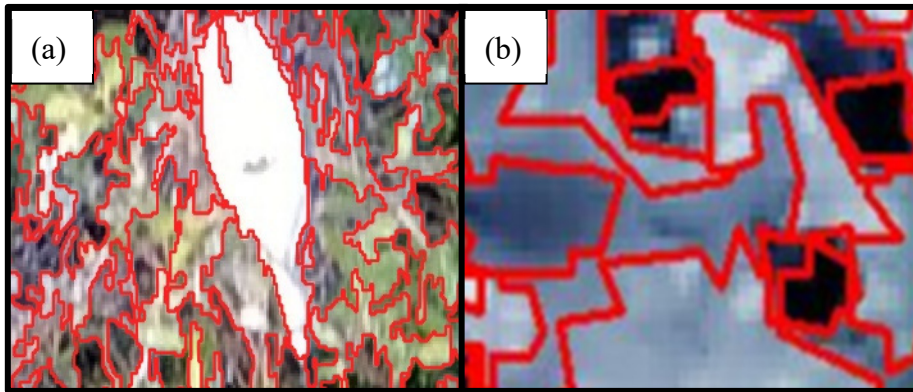

Figure S1. Examples of the segmentation process, showing the differentiation of background segments and an egret at Kanana ((a), white segment) and Straw-necked Ibis at Eulimbah ((b), black segments).

Table S1. Descriptions of datasets with their location and digital object identifier (DOI).

| Description                                                                                               | Location                                                                                                                                                                                                                       | DOI                          |
|-----------------------------------------------------------------------------------------------------------|--------------------------------------------------------------------------------------------------------------------------------------------------------------------------------------------------------------------------------|------------------------------|
| Eulimbah imagery                                                                                          | <a href="https://datadryad.org/stash/dataset/doi:10.5061/dryad.m4r0cn0">https://datadryad.org/stash/dataset/doi:10.5061/dryad.m4r0cn0</a>                                                                                      | 10.5061/dryad.m4r0cn0        |
| Kanana imagery, .dbf files for the freeware and payware methods at both the Kanana and Eulimbah colonies. | <a href="https://figshare.com/articles/Flight1Image_Combined_jpg/11911314">https://figshare.com/articles/Flight1Image_Combined_jpg/11911314</a>                                                                                | 10.6084/m9.figshare.11911314 |
| R code for the freeware and payware methods at both the Kanana and Eulimbah colonies.                     | <a href="https://github.com/RoxFrancis/Automated-Waterbird-Counts">https://github.com/RoxFrancis/Automated-Waterbird-Counts</a><br><a href="https://doi.org/10.5281/zenodo.3715894">https://doi.org/10.5281/zenodo.3715894</a> | 10.5281/zenodo.3715894       |
